# Supplementary material for: Identification of APC Mutation as a Potential Predictor for Immunotherapy in Colorectal Cancer
Source: Hindawi journal article supplement (doi:10.1155/2022/6567998), 2022-07-13
Supplement: f1 [file 6567998.f1.pdf]

**A**

# Altered in 469 (88.49%) of 530 samples (TCGA cohort)

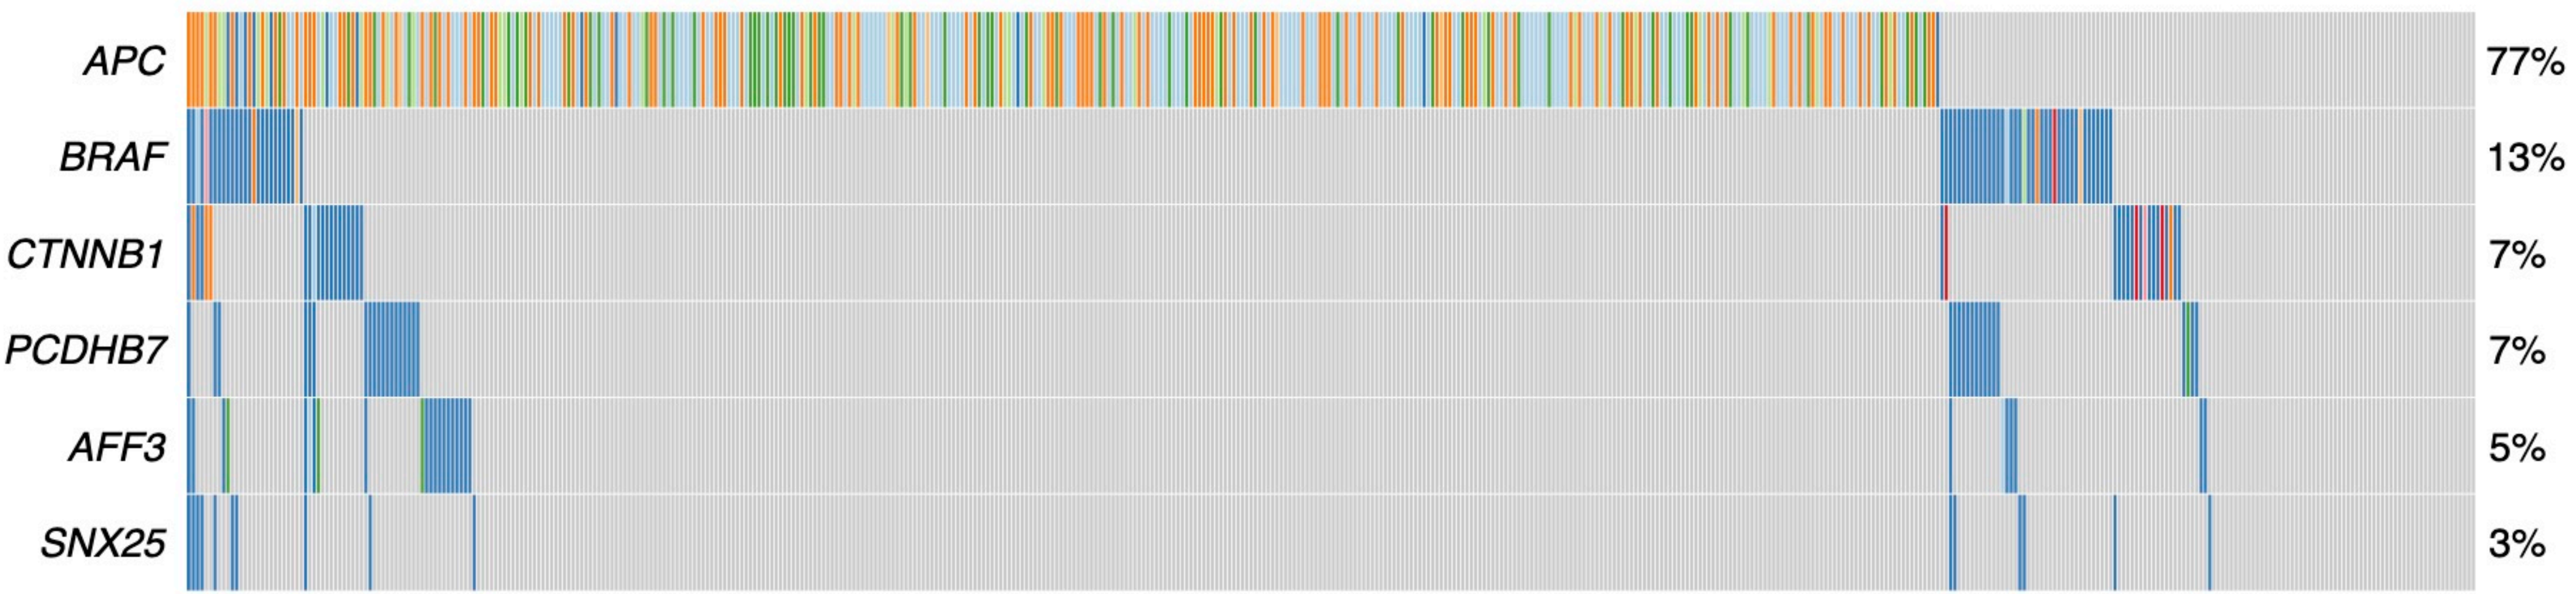**B**

# Altered in 92 (84.4%) of 109 samples (MSKCC cohort)

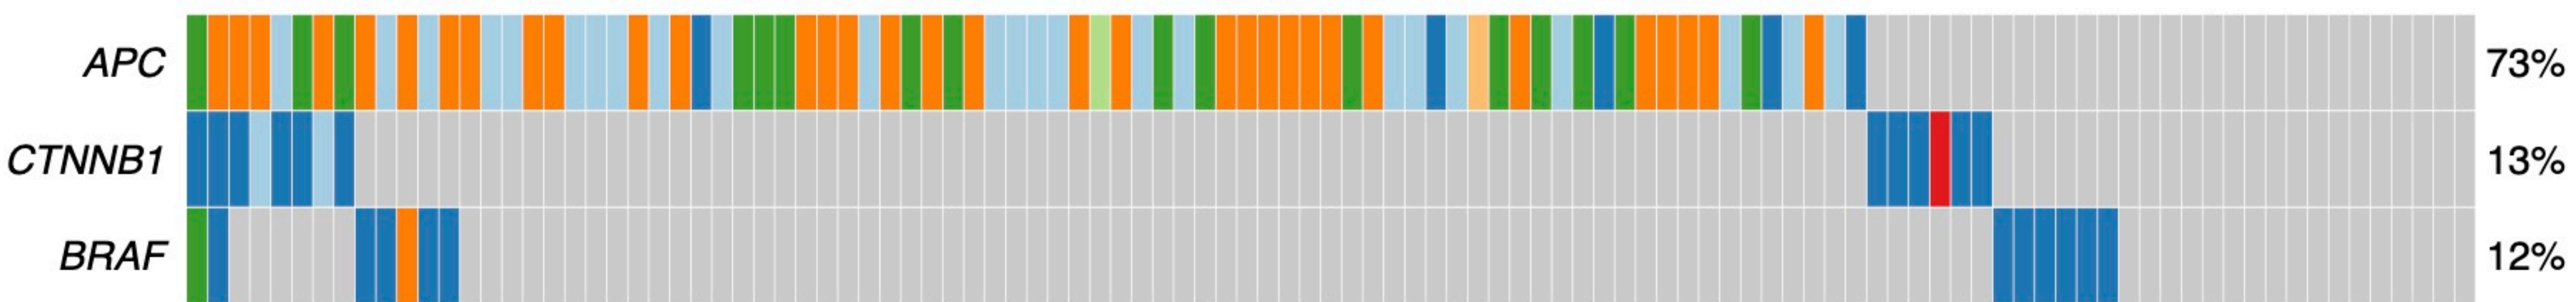

- Missense\_Mutation
- Nonsense\_Mutation
- Frame\_Shift\_Del
- Splice\_Site
- In\_Frame\_Del
- Multi\_Hit
